1 **Are trapping data still suited for home range estimation? An analysis with**  
2 **various estimators, asymptotic models and data ordering procedures**

3 Socias-Martínez L.<sup>1</sup>, Peckre L. R.<sup>2</sup>, Noonan M. J.<sup>3</sup>,

4 <sup>1</sup>Institute of Forest Growth and Forest Computer Sciences, Technical University of Dresden, Dresden,  
5 Germany

6 <sup>2</sup>Cognitive Ethology Lab, German Primate Center GmbH – Leibniz Institute for Primate Research,  
7 Göttingen, Germany

8 <sup>3</sup>Department of Biology, The Irving K. Barber Faculty of Science, The University of British Columbia,  
9 Okanagan Campus, Canada.

10 \*Corresponding author: [lluissociasm@gmail.com](mailto:lluissociasm@gmail.com)

11 Lluís Socias-Martínez: <https://orcid.org/0000-0002-1739-0987>

12 Louise Peckre: <https://orcid.org/0000-0002-0065-8529>

13 Michael Noonan: <https://orcid.org/0000-0003-4512-0535>

14

## 15 **Abstract**

16 Understanding the size of animals' home ranges is vital for studies in ecology and conservation. Trapping  
17 datasets are an important source of information when targeting the biodiversity of an area, inconspicuous  
18 species, or high numbers of individuals in contrast to more expensive telemetry-based methods such as  
19 radio- or GPS-collaring. Currently, studies relying on trapping lack an evaluation of the performance of  
20 existing home range estimation procedures comparable to those developed for telemetry. Using animal  
21 movement simulations, we evaluate three variables reflecting the trade-offs faced by ecologists when  
22 designing a trapping study, 1) the number of observations obtained per individual, 2) the trap density and  
23 3) the proportion of the home range area falling inside of the trapping grid. We compare the performance  
24 of five estimators on these conditions, four commonly used (AKDE, KDE, MCP, LoCoH) and a possible  
25 alternative for situations with low trap density or high number of observations (bicubic interpolation). We  
26 further test suggested benefits of using asymptotic models (Michaelis-Menten and monomolecular) to  
27 assess the total home range area when information obtained per individual is scarce, as this situation  
28 might be common in trapping datasets. In addition, we propose sorting the observations based on the  
29 distance between locations to improve the performance of asymptotic models' estimates. Using the  
30 results of the different procedures we constructed a generalized additive model (GAM) that allows  
31 predicting the bias in home range size under the different scenarios investigated. Our results show that  
32 the proportion of the area covered by the trapping grid and the number of observations were the most  
33 important factors predicting the accuracy and reliability of the estimates. The use of asymptotic models  
34 helped obtaining an accurate estimation at lower sample sizes and this effect was further improved by  
35 distance-ordering. The autocorrelation informed KDE was the estimator performing best under most  
36 conditions evaluated. Nevertheless, bicubic interpolation can be an alternative under common trapping  
37 conditions with low density of traps and low area covered. We provide the current results to the  
38 constructed GAM as a prospective tool for ecologists planning a new study or with already collected

39 datasets that aim at assessing the potential biases in their estimates. Reliable and accurate home range  
40 estimates using trapping data can optimize monetary costs of home range studies, potentially enlarging  
41 the span of species, researchers and questions studied in ecology and conservation.

42

## 43 **Introduction**

44 Home ranges have been defined as "...the area traversed by the individual in its normal activities of food  
45 gathering, mating, and caring for young" (Burt 1943). The intensity of resource use and competition, the  
46 amount of gene flow, the mating system and social structure, and the spread of information and diseases  
47 might all be inferred through animals' space use (Mueller and Fagan 2008, Schick et al. 2008, Dammhahn  
48 and Kappeler 2008, Nathan et al. 2008). Knowledge on a species' use of space is therefore at the core of  
49 understanding biodiversity and design effective conservation measures (Law and Dickman 1998, Allen  
50 and Singh 2016, Opper et al. 2018).

51 Although the ecological definition of the home range is not specific to any data type nor estimator, the  
52 accurate estimation of home ranges is challenged by mismatches between the methods' assumptions and  
53 the nature of the data collected (Hayne 1949, Andrzejewski 2002, Powell and Mitchell 2012, Noonan et  
54 al. 2019, Wszola et al. 2019, Fleming et al. 2019). During the last century, an extensive body of literature  
55 has been directed to describe and quantify biases arising from methods used (see e.g., Hayne 1949, 1950,  
56 Worton 1989, Harris et al. 1990, Seaman et al. 1999, Andrzejewski 2002, Laver and Kelly 2008, Fleming et  
57 al. 2018, 2019). Comparisons of different estimators for home ranges have suggested strengths of each  
58 under different conditions (e.g., sample size, the time between measurements and autocorrelation)  
59 (Hayne 1949, Van Winkle 1975, Rose 1982, Worton 1987, Plotz et al. 2016, Halbrook and Petach 2018,  
60 Noonan et al. 2019, Vieira et al. 2019). Further spatial and temporal heterogeneities have also been  
61 investigated (e.g., ecotypes, physical boundaries) and shown to have an effect (Ouellette and Cardille  
62 2011, Halbrook and Petach 2018, Wszola et al. 2019). The (mis)match between weaknesses and strengths  
63 of estimators and data collected is therefore a major potential source of error in home range estimates  
64 that needs to be evaluated (Hayne 1949, Van Winkle 1975, Worton 1989, Seaman et al. 1999, Kie et al.  
65 2010, Powell and Mitchell 2012, Fleming and Calabrese 2017, Halbrook and Petach 2018, Fleming et al.  
66 2019).

67 Several authors have suggested that if animals exhibit site fidelity (e.g. Ebersole, 1980; Halbrook & Petach,  
68 2018; Heupel, Simpfendorfer, & Hueter, 2004; Powell, Zimmerman, & Seaman, 1997; Reid &  
69 Weatherhead, 1988; Spencer, Cameron, & Swihart, 1990), the information on space use obtained should  
70 follow a saturation curve (Harris et al. 1990, Haines et al. 2009, Soanes et al. 2013, Leo et al. 2016,  
71 Halbrook and Petach 2018, Wszola et al. 2019). Deviations from this saturation may thus indicate that i)  
72 the animals being monitored are not range-resident (e.g., (Morato et al. 2016)), or ii) the individual has  
73 been monitored for too short of a period for the range-resident behavior to be observable (Fleming et al.  
74 2014). The latter problem represents a key challenge that can bias home range estimates and any  
75 subsequent hypothesis testing, or decision making. Modelling the saturation curve can allow estimating  
76 the true home range even if the information is still incomplete (e.g., (Soanes et al. 2013, Leo et al. 2016,  
77 Halbrook and Petach 2018)), thus offering the possibility of reducing the amount of data needed for  
78 accurate estimates. Nevertheless, most empirical studies do not make use of asymptotic models perhaps  
79 because a thorough examination of the performance of this type of analyses is lacking.

80 The mentioned limitations and mismatches between the methods used for obtention of information and  
81 description of space use in animals might be even more pronounced in trapping-based studies. While  
82 trapping studies were once predominant in home range estimation (Mohr 1947, Hayne 1949,  
83 Andrzejewski 2002), they have decayed in the last decades in favor of newer, more accurate and reliable  
84 technologies based on radiotracking or GPS (Innes and Skipworth 1983, Ward 1984, Bergstrom 1988,  
85 Ribble et al. 2002, Gil-Sánchez et al. 2011, Kays et al. 2015). Trapping studies suffer most importantly from  
86 extreme uncertainty on the information obtained per individual which usually consists of few observations  
87 (Dammhahn and Kappeler 2005, Lira and Fernandez 2009, Gil-Sánchez et al. 2011, Kane et al. 2015,  
88 Kumbhojkar et al. 2020). Unlike for telemetry data, where temporal autocorrelation is the predominate  
89 source of bias for home range estimation (Noonan et al. 2019, Silva et al. 2022), small sample sizes are a  
90 key consideration. All home range estimators are sensitive to sample size (Schoener 1981, Fleming et al.

91 2019). Thus, the reliability of information on home ranges coming from trapping studies is often uncertain  
92 and an evaluation of the necessary conditions for accuracy and reliability are needed.

93 In addition to the low number of observations, the size of the trapping grid and its emplacement relative  
94 to the center of an individual's home range can also impact the measurements in trapping studies (Rajska-  
95 Jurgiel 2001, Lukacs et al. 2005, Bondrup-Nielsen 2011, Sun et al. 2014). Due to a lack of understanding  
96 on the biases and limitations of carrying home range analyses with trapping data, researchers with  
97 trapping datasets face extreme uncertainty on the error of their estimates and might even dismiss  
98 conducting home range analyses altogether (Fig. 1). This situation can bias the knowledge on movement  
99 ecology to only those species that can be monitored via telemetry. Trapping data harbor enormous  
100 potential for home range analysis due to the range of species that can be studied and the reduced  
101 budgetary constraints. For instance, camera- or live-trapping can be used to study animals that are too  
102 small to carry a telemetry or GPS collar. Moreover, with the average all-in cost of tracking an animal being  
103 ca. \$10,000 USD (Thomas et al. 2011), collars are expensive, reducing the number of individuals and  
104 species that can be monitored at a given location. In addition, the costs of telemetry-based methods might  
105 set a boundary to the economic background of institutions or researchers in movement ecology. If  
106 trapping based studies prove more reliable than previously thought they could enlarge the scope of  
107 researchers, species and time of monitoring helping improve general knowledge on movement ecology  
108 essential for fundamental and applied science.

109 To fill the current gap in knowledge on trapping datasets for home range analyses we conducted a  
110 thorough evaluation of their accuracy under a vast array of conditions in a set of simulations. We  
111 evaluated the performance of five estimators, two kernel based (autocorrelated kernel density estimation  
112 AKDE, and traditional KDE), a polygon-based (minimum convex polygon MCP) and its generalization (local  
113 convex hull LoCoH) and an interpolation-based method (bicubic interpolation BicubIt). Moreover, we

114 evaluated the performance of two asymptotic model predictions (Michaelis-Menten MicMen and  
115 Monomolecular MonMol) as they have been suggested to help when information is incomplete, a  
116 common situation for trapping datasets. In addition, we evaluated these asymptotic models on two  
117 conditions for ordering the observations, time-ordered and distance-ordered as we suspected that the  
118 latter could improve their predictions. The combinations of all mentioned variables were evaluated under  
119 three key parameters for designing a trapping study: the trap density, the effective sample size, and the  
120 proportion of the home range covered by the trapping grid. These measures correspond to the amount  
121 of effort and money invested in a study based on animal captures and can impact the estimates of home  
122 range size. Our analyses thus may point to optimal investments for describing animal home ranges in  
123 studies relying on animal trapping, representing an important tool for ecologists that aim at study  
124 movement using trap data.

## 125 **Material and Methods**

### 126 **Simulating animal movements and trapping**

127 We simulated home ranges with a circular area of 100 Hectares and a uniform distribution probability for  
128 observing the animal across it. We simulated movement for 100 individuals moving within this type of  
129 home range without any autocorrelation (i.e., using a I.I.D. movement model), as trap data are likely to  
130 be free from meaningful autocorrelation. To capture the individuals, we generated a series of trapping  
131 grids with varying densities measured as number of traps in each line of the grid per home range radius  
132 (ranging from 2 to 42 over intervals of 10, see Fig. 2). Each trapping grid was placed with its center at  
133 different distances from the center of the home range creating a coverage ranging from 20 to 100% (see  
134 Fig. 2). We considered an animal captured if an observation fell within 200m of a trap (approx.  
135 corresponds to 20m for small animals with home ranges of 1Ha). We chose this measure to simulate the  
136 attraction of baiting in real-world scenarios with live trapping but can also be understood as a metric of  
137 visibility for camera traps. Finally, for each individual in each condition of trap density and area covered

138 we simulated positions until it was captured 2000 times. The scripts necessary to reproduce these  
139 simulations will be provided when published in a peer-review journal.

## 140 **Fitting estimators and asymptotic models**

### 141 *Incremental analyses: home range area as a function of the number of observations*

142 For each dataset we decided a set of ticks between 2 and 2000 observations on which to conduct the  
143 estimates of home ranges. The interval between ticks increased progressively as we expected redundancy  
144 in information because of the asymptotic behavior of spatial variance for range-resident animals. Based  
145 on these observation number ticks we performed two orderings of the locations for each individual. The  
146 first corresponds to standard use in home range analyses, with observations ordered by time (time-  
147 ordered hereafter). The second one was achieved by taking each subset of observations from the time  
148 ordered dataset and reordering based on distance using farthest point sampling (Fig. 3). Farthest point  
149 sampling allows reordering the data, with each point being followed by its corresponding farthest point  
150 in the dataset based on Euclidean distances, excluding computed points already used. By doing so, while  
151 for each number of observations both the time ordered and the distance ordered dataset contained the  
152 same exact records of space positions, the distance ordered included most information on space use  
153 within the first observations (Fig. 3).

154 For each dataset we calculated the home range area incrementally. For the time-ordered dataset this  
155 incremental analysis corresponded to calculate the home range area at each tick ( $Area_i$ ), yielding a unique  
156 incrementing curve of home range area per dataset from 2 to 2000 observations. For the distance-ordered  
157 dataset a different curve ending at each tick was calculated (Fig. 3). Each tick had a different curve because  
158 each subset had different farthest points being redistributed accordingly with more information clumping  
159 in the first observations.



## 160 *Home range estimators*

161 To calculate the home range areas, five estimators were used. A widely used method, the Kernel Density  
162 Estimator (KDE) was chosen as it is the most statistically efficient non-parametric density estimator. We  
163 further used a refined version of the KDE that takes autocorrelation into account (AKDE) and has further  
164 refinements for small sample sizes, irregular sampling, and measurement error (Silva et al. 2022). For KDE,  
165 an automatic bandwidth selection method was applied to each subset of the data based on bisection  
166 algorithm that finds the smallest bandwidth generating  $n$  polygons (Kie 2013). We set  $n$  to 1 to have a  
167 single continuous home range area. Two commonly used polygon-based methods, the minimum convex  
168 polygon (MCP) and its generalization, the local convex hull (LoCoh) were also used (see Supporting  
169 information, SI). Furthermore, we explored the properties of a home range estimation based on bicubic  
170 interpolation (BicubIt). We expect this latter estimator to perform better under low trap densities as well  
171 as with very large datasets when kernel-based estimators become ineffective due to the bandwidth  
172 limiting to 0 when  $n \rightarrow \infty$  (see SI).

## 173 *Asymptotic models*

174 A Michaelis-Menten model as described in (Leo et al. 2016) (eq 1) was fitted to the home range area as a  
175 function of the number of observations with automatic initial values for the rest of parameters. The  
176 Michaelis-Menten model is a saturating model that is well known in the biological sciences. A challenge  
177 with this model, however, is that the asymptote can be difficult to estimate with data (Bolker 2008). We  
178 therefore also explored the potential benefits of the monomolecular model (eq 2). The models were fitted  
179 to each tick in the single curve for the time-ordered dataset using Levenberg-Marquardt nonlinear least-  
180 squares algorithm. For the distance-ordered, the models were fitted to each curve created with the  
181 observations until a given tick. The predicted asymptotes were retrieved and assigned as value for the  
182 home range area to the number of observations it used.

$$183 \quad Area_i = \frac{\alpha * i}{B + i} \quad \text{eq (1)}$$

184  $Area_i = \alpha * (1 - e^{-e^{k*i}})$  eq (2)

185 **Evaluating the different methods for home range estimation on trapping data**

186 We transformed the areas obtained in the previous analyses to a proportion of the true 95% home-range  
187 area. Using the variables describing the estimator used, the time-ordering procedure, the asymptotic  
188 model used and the three variables for study design (number of observations, trap density and area  
189 covered) we modelled the accuracy of area estimates using a generalized additive model (GAM) in the  
190 mgcv package (Wood 2017) in R version 4.0.5 (R Core Team 2019). GAM was chosen to capture the  
191 possible complex non-linear relationships between our variables of interest and the home range area  
192 predicted. The proportion of the true area was made dependent on the number of observations, the trap  
193 density and the area covered by the trapping grid using a gaussian link function (eq. 3). Since asymptotic  
194 models can overestimate the area dramatically under low number of observations, we filtered out  
195 extreme outliers before fitting the GAM. We defined extreme outliers as those that overestimated or  
196 underestimated the true area by a factor of 10. This type of aberrant predictions can be easily detected  
197 by researchers in their datasets once some knowledge on the species is available.

198  $Area = Intsem + f_1(\log_{10} NbObs) \cdot Intsem + f_2(TrapD) \cdot Intsem + f_3(AreaC) \cdot Intsem +$   
199  $f_4(\log_{10} NbObs \cdot TrapD) \cdot Intsem + f_5(\log_{10} NbObs \cdot AreaC) \cdot Intsem + f_6(TrapD \cdot AreaC) \cdot$   
200  $Intsem + f_7(\log_{10} NbObs \cdot TrapD \cdot AreaC) \cdot Intsem + \varepsilon$  eq (3)

201 *where  $f_{1-3}$  are smooth and  $f_{4-7}$  partial tensor product interaction smooth functions estimated by*  
202 *restricted maximum likelihood*

203 The number of observations was transformed using its base ten logarithm and the knots for the basis  
204 functions were placed according to a logarithm function in the range of observed values. Placing the knots  
205 in this way allowed to model the variation at low observation numbers when small changes are likely to  
206 induce much stronger effects than at the higher end. We included a three-way interaction as a tensor

207 product interaction between the number of observations, the trap density and the area covered as their  
208 effects are all conditional on each other (eq. 3). All lower-level interactions combinations and main effects  
209 of the three variables were also included as tensor product interactions and smooth terms respectively.

210 Furthermore, a factor variable gathering the home range estimator, the asymptotic model and the  
211 sampling ordering procedure (intsem) was generated. “intsem” was included as a main effect and as a “by  
212 variable” on each smooth and tensor product interaction term. Including this smooth-by-factor  
213 interactions allowed fitting a smooth term separately for each level of “intsem”. Such flexibility was  
214 needed to capture the likely different shapes that the functions for each level and combinations of the  
215 variables of interest might have. The use of a common variable, “intsem”, reduced the computational  
216 burden of modelling the home range estimator, the asymptotic model and the sampling order procedure  
217 as separate terms. The sufficiency of the basis dimensions for each smooth term were evaluated by using  
218 the standard procedures for GAM evaluation in the mgcv package including the tests of gam.check  
219 function and the diagnostics of linear modelling assumptions. For further details on other parameters see  
220 SM.

221 We then evaluated the accuracy and reliability of home range estimates in trapping settings using our  
222 simulations. To visually identify the parameter spaces of interest for trapping studies, predictions were  
223 considered accurate if fell within  $\pm 10\%$  of the true area and reliable if the confidence interval had a  
224 breadth not exceeding  $\pm 20\%$  of the estimate. For each graphic representation we described with  
225 emphasis only the values that were accurate and reliable according to the above definitions. When  
226 possible, we also described the conditions that allowed reaching accuracy instead of under- or over-  
227 estimation and reliability.

228 To produce the graphic representations summarizing the results, we predicted the home range area as a  
229 function of the two-way interactions between the number of observations and the trapping density (while

230 setting the area covered to 100%), between the number of observations and the area covered (setting  
231 the trap density to 2), and between the area covered and the trap density (setting the number of  
232 observations to 7) using the constructed GAM. The fixed values of low trap density and low number of  
233 observations were chosen to describe possible common situations in field studies using trapping  
234 procedures. Further graphic representations including fixed values at low, mean, and high values can be  
235 found in the SI.

## 236 **Results**

237 The 43 individuals simulated yielded a total number of 415,612 observations based on the combination  
238 of 5 estimators, 2 ordering procedures, 3 model types (including no model), 6 trap densities, 6 area  
239 covered proportions and 28 different number of observations. Overall, the GAM model performed  
240 satisfactorily with most residuals being close to 0 (see SI). There existed some level of heteroskedasticity  
241 with high variance characterizing the areas at low number of observations. Moreover, residuals were non-  
242 normally distributed due to a positive skew resulting from i) the distribution of the response (bounded at  
243 0 but unbounded at positive infinity) and ii) high overestimated asymptotic models' predictions at low  
244 number of observations (see SI).

### 245 **Interacting effects of number of observations and trap density**

246 When the trapping grid covered the home range entirely, the number of observations was the primary  
247 factor driving the accuracy of the estimates (Fig. 4 see vertical color bands and accuracy niches). The  
248 reliability of estimates also depended more strongly on the number of observations than on the trap  
249 density with an estimator-specific minimum above which estimates were consistently (Fig. 4). The  
250 estimators that conformed more strongly to the described general patterns were the two Kernel-based.  
251 The two polygon-based estimators followed in conformity, deviating from the described pattern when  
252 used with time-ordered asymptotic models where accuracy niches reacted more strongly to trap density.

253 BicubIt stand out from the rest by having the accuracy and reliability dependent equally on the number  
254 of observations and the trap density (Fig. 4 see diagonal color bands and lines).

255 The two Kernel density estimators outperformed the rest with accurate estimates at 9 and 20  
256 observations (AKDE and KDE respectively). The rest underestimated the true area before  $\sim 1000$  (MCP and  
257 LoCoH) and  $\sim 600$  (BicubIt, only at low trap density) observations where gathered. The reliability of  
258 estimates was obtained at very low number of observations except for BicubIt where the higher the trap  
259 density the more observations were needed for a reliable estimate.

260 Interestingly, using the asymptotic models generated accuracy and reliability patterns that had estimator-  
261 specific optima generally lacking asymptotic consistency (i.e., adding more observations after the accuracy  
262 and reliability niche was attained induced its loss). The two Kernel-based methods suffered by needing  
263 more observations for an accurate estimate than when using the raw data alone, particularly at low trap  
264 densities. At higher trap densities, though, KDE benefited from using MonMol through improved accuracy  
265 of estimates at low sample sizes. MCP became unreliable when used with MicMen and never reached  
266 accuracy while MonMol allowed accurate and reliable estimates at lower number of observations. LoCoH  
267 benefitted from using MicMen by reaching reliability and accuracy at  $\sim 10$  observations while using  
268 MonMol led to very limited accuracy niches. Similarly, BicubIt benefited only from MicMen and not from  
269 MonMol. MicMen allowed to have accurate and reliable predictions between 3 and 80 observations for  
270 the smallest trap densities.

271 Distance-ordering helped through stabilization of the accuracy and reliability niches after their advent and  
272 through a higher set of conditions yielding reliable estimates. Nevertheless, this procedure only benefited  
273 accuracy with KDE by reducing the minimum number of observations and with BicubIt by expanding the  
274 range of trap densities yielding an accurate estimate.

## 275 **Interacting effects of number of observations and area covered**

276 When the trap density was four traps per grid line per home range radius, increasing both observations  
277 and area covered led to higher accuracy. Reliability depended on an estimator-specific minimum number  
278 of observations above which increasing the area covered led to more reliable estimates. The accuracy of  
279 Kernel-based estimators was affected more strongly by the area covered than by the number of  
280 observations (Fig. 5, see “v” shaped accuracy niches along the x axis). The polygon-based estimators were,  
281 on the contrary, more affected by the number of observations, once a minimum area covered was  
282 attained. BicubIt offered a bimodal accuracy were the extremes of area covered tended to yield more  
283 accurate estimates. AKDE performed best, followed by KDE, BicubIt, MCP and LoCoH. AKDE was able to  
284 offer accurate and reliable estimates with 5 observations and an area covered as low as 50%, while KDE  
285 needed at least 40 observations. MCP and LoCoH were unable to offer accurate estimates while BicubIt  
286 needed the highest area covered and number of observations.

287 Using asymptotic models offered some benefits albeit the accuracy niches were not consistent when  
288 increasing sample sizes. Accuracy niches had a “v” shape (except for BicubIt, indicating optimal values  
289 changing with the upper space in the “v” risking overestimation. AKDE and KDE benefited by lowering the  
290 minimum area covered (~30%) in order to retrieve an accurate estimation. MCP benefited from MonMol  
291 reducing the minimum number of observations to ~15, while MicMen yielded unreliable estimates. Both  
292 asymptotic models helped LoCoH achieve accurate estimates, despite only MicMen with reliability at ~15  
293 observations. BicubIt benefited from asymptotic models from increased reliability and accuracy, but more  
294 so from MicMen. Using MicMen allowed to retrieve accurate estimations at as low as 4-5 observations  
295 with both high and low area covered.

296 Use of distance-ordering generated more consistent accuracy and reliability niches only for the polygon-  
297 based methods while the others were affected idiosyncratically. AKDE was disturbed because the ctm  
298 package algorithm did not perform consistently with reordered data generating low sample sizes used to

299 fit GAM (see SI). KDE with distance-ordering did not improve but rather shifted the optimal value of area  
300 covered with increasing observations. For MCP distance-ordering only improved the reliability of  
301 estimates. The use of distance-ordering allowed better estimates than the raw LoCoh without reaching  
302 our criteria. With Bicublt, using distance-ordering did not improve or hampered but changed the shape of  
303 the accuracy niche.

### 304 **Interacting effects of trap density and area covered**

305 When the number of observations was fixed to 7, depending on the estimator used, only the area covered,  
306 or a combination of area covered and trap density values determined the accuracy and reliability. Kernel-  
307 based estimators offered reliable estimates the accuracy of which was determined solely by variation in  
308 the area covered (Fig. 6, see elongated accuracy niches along the x axis). The patterns for the remaining  
309 three estimators were more complex. Only AKDE was able to recover an accurate estimate at  
310 intermediate-high values of area covered when estimators were used alone.

311 Using asymptotic models yielded improvements in accuracy for all estimators. AKDE improved by reducing  
312 the area covered needed for an accurate estimate (MonMol 20% to 40%; MicMen 40% to 60%; for lowest  
313 and highest trap densities respectively). KDE greatly benefitted from an increase in accuracy that achieved  
314 our criteria when the area covered was between 20 and 60% for all except the lowest and highest trap  
315 density values. The use of MonMol allowed accurate estimates at all trap densities but for a narrower  
316 range at intermediate area covered values at the lowest trap densities and to 20% at the highest trap  
317 densities. Using MicMen allowed MCP to yield reliable and accurate estimates for all area covered values  
318 at intermediate trap densities while MonMol only for two values of area covered, 50 and 70%. Asymptotic  
319 models helped increasing accuracy of LoCoH but these weren't reliable according to our criteria. Bicublt  
320 was empowered by MicMen yielding accuracy at the smallest trap densities for 20% and 100% area  
321 covered while MonMol yielded accurate estimates only at 20% area covered.

322 Using distance-ordering impacted negatively AKDE impairing its reliability. KDE on the contrary benefited  
323 substantially by having more accuracy overall despite needing an increase in area covered (MicMen 40%  
324 to 80% and MonMol 60% to 100% for low and medium/large values of trap density respectively). For MCP  
325 MonMol with distance-ordering helped retrieving reliable estimates from 40% area covered and accurate  
326 at 100% area covered from medium to high values of trap density. LoCoh benefited from distance ordering  
327 by increasing reliability, but accuracy was not reached. Distance-ordering did not improve or hamper  
328 Bicublt estimates.

## 329 **Discussion and conclusion**

330 Our results indicate that estimators used with telemetry and GPS data can yield reliable estimates of home  
331 range size when used with trapping data. Depending on the methodology, estimators examined were able  
332 to retrieve accurate and reliable estimates even in the challenging scenarios including very low spatial  
333 resolution and reduced information per individual. Such performance indicates that, despite having gone  
334 underused in favor of more modern methodology, trapping data can continue to prove a valuable source  
335 for home range studies.

336 Under most scenarios investigated, AKDE was able to recover an accurate estimate at lower sample sizes  
337 than the other estimators. KDE usually followed behind while MCP, LoCoH and Bicublt needed a much  
338 higher number of observations. This behavior is consistent with the accuracy of these estimators on  
339 telemetry data (Noonan et al. 2019). The use of asymptotic models helped all estimators except AKDE in  
340 reaching an accurate estimation with fewer observations. Nevertheless, counterintuitively, under most  
341 scenarios the use of asymptotic models' predictions reduced the consistency of the reached accuracy. For  
342 example, as hypothesized by (Gautestad and Mysterud 1995), MCP (and LoCoH) needed more than 1500  
343 observations to reach the asymptote with the true home range. While using asymptotic models'  
344 predictions helped MCP, LoCoH and Bicublt reduce by one or two orders of magnitude the number



345 observations needed for an accurate estimation, increasing the number of observations further led to  
346 changes in the predicted area. The use of distance ordering prior to calculating the home range areas and  
347 fitting the asymptotic models allowed both reducing the number of observations albeit more moderately,  
348 between 5 to 10 times, while maintaining consistency and attaining reliability at lower sample sizes (see  
349 SI). Thus, we suggest the use of asymptotic models in home range analyses cautiously, possibly with  
350 distance ordering and additional checks on the reliability of asymptotic estimates as developed in (Haines  
351 et al. 2009).

352 Promisingly, accurate estimates of the home range area were obtained with as few as 3 observations per  
353 individual, a finding that could encourage movement ecologists to plan trapping studies and other  
354 researchers to exploit their existing trapping datasets for home range estimates. Our findings of accuracy  
355 and reliability of estimators for home range analyses with trapping data might offer an additional push to  
356 enlarge the range of species and researchers in home range studies. A higher diversity of species and  
357 researchers can result in new questions being addressed by a more inclusive research milieu not limited  
358 by the large budgets needed for telemetry-based monitoring. A standard metallic foldable trap for small  
359 animals might cost on the order of tens of dollars while the average, all-in cost of tracking an animal is on  
360 the order of tens of thousands of dollars (Thomas et al. 2011). Since traps can be used for several years if  
361 well maintained and are not used for a unique individual, they might turn a smaller budget into a  
362 competitive alternative.

363 Telemetry devices are also best deployed on animals large enough to carry them or else become  
364 extremely limited by their small battery life. Although tag sizes have been rapidly decreasing, most species  
365 are still too small to be monitored by telemetry (Kays et al. 2015). Our results show how the home range  
366 area of small animals unsuited to collaring can be accurately monitored using traps. Nevertheless,  
367 trapping in wild animals is not free of costs. Traps might be disease vectors and harmful if not maintained

368 properly. Moreover, the psychophysiological welfare of animals should not be neglected, and the time  
369 spent in the trap minimized. Reducing the time in the trap might also improve survival because captured  
370 animals are vulnerable to predation. An alternative to live trapping could be the use of camera traps or  
371 sound recorders (Chavel et al. 2017). The considerations of trap density, number of observations and area  
372 covered all should hold if autocorrelation between detections is taken into account.

373 Over the range of conditions examined, the proportion of the home range area covered by the trapping  
374 grid and the number of observations had a much stronger impact than the trap density. Thus,  
375 theoretically, the effort of trapping studies could be redirected to expanding the grid to encompass a  
376 greater study area instead of densifying it. However, for animals that have overlapping home ranges,  
377 reducing the trap density might lead to reduce the chances of relocating a focal individual several times.  
378 Under scarcity of traps other residents may be trapped impeding gathering enough observations per  
379 individual. To increase the number of observations per individual and the number of individuals, one could  
380 increase the number of traps on each knot of the grid, thereby slightly reducing the working time by  
381 clumping traps in space. In addition, in our simulations, traps were highly effective having a range of  
382 attraction of 200m for a home range of 1 Ha as we tried to mimic high visibility or baited traps. If traps  
383 have a lower range of action, sparsening the grid might significantly reduce the sample size per individual.  
384 Reducing the number of grid knots may also alter other properties in real-world studies. For example,  
385 having a sparser grid could lead to more individual home ranges being only partially covered, impacting  
386 the information obtained. Depending on the severity of the loss of area covered by the grid, AKDE, KDE  
387 or Bicublt should be preferred, the latter two being most performant if used with asymptotic models  
388 under the smallest area covered and sparser grids here examined. In combination with monomolecular  
389 asymptotic models, Bicublt can retrieve an accurate and reliable estimate at as low as 2-3 observations.  
390 Thus, a possibility for reducing the costs of trapping studies would be to drastically sparse the grid and

391 use Bicublt. This could serve for example with trapping studies using sophisticated camera traps. Further  
392 investigations on wild populations simultaneously monitored with telemetry or GPS and trapping should  
393 be conducted to confirm our findings in such challenging scenarios. We suggest studies reduce the trap  
394 density in favor of long term or more intense monitoring but ideally researchers should have a sense of  
395 the mean home range radius of the species of interest, the degree of territoriality as well as the range of  
396 attraction of the traps. By doing so, they might be able to assess the “sweet spot” between reducing the  
397 number of traps and the reliability and accuracy of the information obtained.

398 In this study we have used the simplest type of home range, one that is circular, and the animal movement  
399 independent within it to have a first sense of how common and uncommon methods performed with  
400 trapping data. Due to the complexity and computational burden of the range of methods here used we  
401 opted for the simplest case of uncorrelated movement detections. Given that the most reliable and  
402 accurate estimator was the only one that doesn't assume uncorrelated observations (AKDE), we suspect  
403 that adding autocorrelation to the data shouldn't change the main conclusions of the study (i.e., that trap  
404 data contain sufficient information for home-range estimation). On scenarios with autocorrelated data,  
405 the difference between AKDE and the other estimators should broaden as the rest of estimators become  
406 impacted by the autocorrelation in the observations. Besides this, animal locations obtained with trapping  
407 methods should generally be less autocorrelated, at least for live trapping. The elapsed time between one  
408 observation and the next for the same individual should generally exceed the range crossing time. It would  
409 be important though in trapping studies to control for the time of the day since animals may repeatedly  
410 use the same locations for resting or sleeping. Thus, if traps are always set before the onset of activity, a  
411 given individual might be trapped always near the resting place generating autocorrelation. In addition,  
412 non-circular shapes of home ranges, which might be common in nature, could trigger biases in estimates  
413 (Seaman et al. 1999, Halbrook and Petach 2018). A possibility to improve the presented methodology in  
414 this context could be to tune the reference bandwidth allowing non-continuous polygons or use habitat-

415 informed versions of KDE (Halbrook and Petach 2018). Nevertheless, these considerations might be  
416 irrelevant for conservation studies were the target might be the area that encompasses all resources used  
417 by an animal *sensu* (Burt 1943), even if they use linear corridors to travel between food patches or  
418 shelters. Overall, the results of the current study might offer a valuable reference to assess bias in home  
419 range analyses with trapping data.

420 The evidence here presented can act as a useful building block for future research. Although further  
421 research might nuance the results here presented, the main finding that trapping data is a useful  
422 alternative to more expensive technology for home range size estimates is unlikely to change. The use of  
423 trapping data might enlarge the range of ideas that can be explored by broadening the scope of  
424 researchers pursuing, and species used in, home range analyses.

## 425 **Acknowledgments**

426 We are very grateful to Johannes Signer for his advice on the implementation of functions from the R  
427 package "amt". MJN was supported by an NSERC Discovery Grant RGPIN-2021-02758.

## 428 **Authors contributions**

429 L S-M and L P developed the ideas that served as first step of this project. MJ N suggested simulations as  
430 a tool for testing, the use of bicubic interpolation and further research goals. L S-M led the coding and  
431 wrote the first draft while all authors contributed to coding and writing the final version of the manuscript.

## 432 **Data availability**

## 433 **References**

- 434 Allen, A. M. and Singh, N. J. 2016. Linking Movement Ecology with Wildlife Management and  
435 Conservation. - Front. Ecol. Evol. in press.
- 436 Andrzejewski, R. 2002. The home-range concept in rodents revised. - Acta Theriol. (Warsz.) 47: 81–101.

- 437 Bergstrom, B. J. 1988. Home Ranges of Three Species of Chipmunks (*Tamias*) as Assessed by  
438 Radiotelemetry and Grid Trapping. - *J. Mammal.* 69: 190–193.
- 439 Bolker, B. M. 2008. *Ecological models and data in R*. - Princeton University Press.
- 440 Bondrup-Nielsen, S. 2011. Density estimation as a function of live-trapping grid and home range size. -  
441 *Can. J. Zool.* in press.
- 442 Burt, W. H. 1943. Territoriality and home range concepts as applied to mammals. - *J. Mammal.* 24: 346–  
443 352.
- 444 Chavel, E. E. et al. 2017. Comparative evaluation of three sampling methods to estimate detection  
445 probability of American red squirrels (*Tamiasciurus hudsonicus*). - *Mamm. Biol.* 83: 1–9.
- 446 Dammhahn, M. and Kappeler, P. M. 2005. Social system of *Microcebus berthae*, the world’s smallest  
447 primate. - *Int. J. Primatol.* 26: 407–435.
- 448 Dammhahn, M. and Kappeler, P. M. 2008. Small-scale coexistence of two mouse lemur species  
449 (*Microcebus berthae* and *M. murinus*) within a homogeneous competitive environment. -  
450 *Oecologia* 157: 473–483.
- 451 Ebersole, J. P. 1980. Food density and territory size: an alternative model and a test on the reef fish  
452 *Eupomacentrus leucostictus*. - *Am. Nat.* 115: 492–509.
- 453 Edwards, S. M. 2020. lemon: Freshing Up your “ggplot2” Plots.
- 454 Fleming, C. H. and Calabrese, J. M. 2017. A new kernel density estimator for accurate home-range and  
455 species-range area estimation. - *Methods Ecol. Evol.* 8: 571–579.
- 456 Fleming, C. H. et al. 2014. From Fine-Scale Foraging to Home Ranges: A Semivariance Approach to  
457 Identifying Movement Modes across Spatiotemporal Scales. - *Am. Nat.* 183: E154–E167.
- 458 Fleming, C. H. et al. 2018. Correcting for missing and irregular data in home-range estimation. - *Ecol.*  
459 *Appl.* 28: 1003–1010.
- 460 Fleming, C. H. et al. 2019. Overcoming the challenge of small effective sample sizes in home-range  
461 estimation. - *Methods Ecol. Evol.* in press.
- 462 Gautestad, A. O. and Mysterud, I. 1995. The Home Range Ghost. - *Oikos* 74: 195–204.
- 463 Gil-Sánchez, J. M. et al. 2011. The use of camera trapping for estimating Iberian lynx (*Lynx pardinus*)  
464 home ranges. - *Eur. J. Wildl. Res.* 57: 1203–1211.
- 465 Haines, A. et al. 2009. A Method for Determining Asymptotes of Home-Range Area Curves. - *Natl. Quail*  
466 *Symp. Proc.* in press.
- 467 Halbrook, R. S. and Petach, M. 2018. Estimated mink home ranges using various home-range estimators.  
468 - *Wildl. Soc. Bull.* 42: 656–666.

- 469 Harris, S. et al. 1990. Home-range analysis using radio-tracking data—a review of problems and  
470 techniques particularly as applied to the study of mammals. - *Mammal Rev.* 20: 97–123.
- 471 Hayne, D. W. 1949. Calculation of Size of Home Range. - *J. Mammal.* 30: 1–18.
- 472 Hayne, D. W. 1950. Apparent Home Range of *Microtus* in Relation to Distance between Traps. - *J.*  
473 *Mammal.* 31: 26–39.
- 474 Heupel, M. R. et al. 2004. Estimation of Shark Home Ranges using Passive Monitoring Techniques. -  
475 *Environ. Biol. Fishes* 71: 135–142.
- 476 Hocking, T. D. 2021. *directlabels: Direct Labels for Multicolor Plots.*
- 477 Innes, J. G. and Skipworth, J. P. 1983. Home ranges of ship rats in a small New Zealand forest as revealed  
478 by trapping and tracking. - *N. Z. J. Zool.* 10: 99–110.
- 479 Kane, M. D. et al. 2015. Potential for camera-traps and spatial mark-resight models to improve  
480 monitoring of the critically endangered West African lion (*Panthera leo*). - *Biodivers. Conserv.*  
481 24: 3527–3541.
- 482 Kassambara, A. 2020. *ggpubr: “ggplot2” Based Publication Ready Plots.*
- 483 Kays, R. et al. 2015. Terrestrial animal tracking as an eye on life and planet. - *Science* 348: aaa2478.
- 484 Kie, J. G. 2013. A rule-based ad hoc method for selecting a bandwidth in kernel home-range analyses. -  
485 *Anim. Biotelemetry* 1: 13.
- 486 Kie, J. G. et al. 2010. The home-range concept: are traditional estimators still relevant with modern  
487 telemetry technology? - *Philos. Trans. R. Soc. Lond. B. Biol. Sci.* 365: 2221–2231.
- 488 Kumbhojkar, S. et al. 2020. A Camera-Trap Home-Range Analysis of the Indian Leopard (*Panthera pardus*  
489 *fusca*) in Jaipur, India. - *Animals* 10: 1600.
- 490 Laver, P. N. and Kelly, M. J. 2008. A critical review of home range studies. - *J. Wildl. Manag.* 72: 290–298.
- 491 Law, B. S. and Dickman, C. R. 1998. The use of habitat mosaics by terrestrial vertebrate fauna:  
492 implications for conservation and management. - *Biodivers. Conserv.* 7: 323–333.
- 493 Leo, B. T. et al. 2016. Home Range Estimates of Feral Cats (*Felis catus*) on Rota Island and Determining  
494 Asymptotic Convergence<sup>1</sup>. - *Pac. Sci.* 70: 323–331.
- 495 Lira, P. K. and Fernandez, F. A. dos S. 2009. A comparison of trapping- and radiotelemetry-based  
496 estimates of home range of the neotropical opossum *Philander frenatus*. - *Mamm. Biol.* 74: 1–8.
- 497 Lukacs, P. M. et al. 2005. Evaluation of trapping-web designs. - *Wildl. Res.* 32: 103–110.
- 498 Mohr, C. O. 1947. Table of Equivalent Populations of North American Small Mammals. - *Am. Midl. Nat.*  
499 37: 223–249.

- 500 Morato, R. G. et al. 2016. Space Use and Movement of a Neotropical Top Predator: The Endangered  
501 Jaguar (M Stöck, Ed.). - PLOS ONE 11: e0168176.
- 502 Mueller, T. and Fagan, W. F. 2008. Search and navigation in dynamic environments—from individual  
503 behaviors to population distributions. - *Oikos* 117: 654–664.
- 504 Nathan, R. et al. 2008. A movement ecology paradigm for unifying organismal movement research. -  
505 *Proc. Natl. Acad. Sci.* 105: 19052–19059.
- 506 Noonan, M. J. et al. 2019. A comprehensive analysis of autocorrelation and bias in home range  
507 estimation. - *Ecol. Monogr.* 89: e01344.
- 508 Oppel, S. et al. 2018. Spatial scales of marine conservation management for breeding seabirds. - *Mar.*  
509 *Policy* 98: 37–46.
- 510 Ouellette, M. and Cardille, J. A. 2011. The Complex Linear Home Range Estimator: Representing the  
511 Home Range of River Turtles Moving in Multiple Channels. - *Chelonian Conserv. Biol.* 10: 259–  
512 265.
- 513 Plotz, R. D. et al. 2016. Standardising Home Range Studies for Improved Management of the Critically  
514 Endangered Black Rhinoceros. - *PloS One* 11: e0150571.
- 515 Powell, R. A. and Mitchell, M. S. 2012. What is a home range? - *J. Mammal.* 93: 948–958.
- 516 Powell, R. A. et al. 1997. Ecology and behaviour of North American black bears: home ranges, habitat,  
517 and social organization. - Chapman & Hall.
- 518 R Core Team 2019. R: A Language and Environment for Statistical Computing. - R Foundation for  
519 Statistical Computing.
- 520 Rajska-Jurgiel, E. 2001. Movement behaviour of woodland rodents: looking from beyond small trapping  
521 grids. - *Acta Theriol. (Warsz.)* 46: 145–159.
- 522 Reid, M. L. and Weatherhead, P. J. 1988. Topographical constraints on competition for territories. -  
523 *Oikos*: 115–117.
- 524 Ribble, D. O. et al. 2002. A Comparison of Home Ranges of two Species of *Peromyscus* Using Trapping  
525 and Radiotelemetry Data. - *J. Mammal.* 83: 260–266.
- 526 Rose, B. 1982. Lizard Home Ranges: Methodology and Functions. - *J. Herpetol.* 16: 253–269.
- 527 Schick, R. S. et al. 2008. Understanding movement data and movement processes: current and emerging  
528 directions. - *Ecol. Lett.* 11: 1338–1350.
- 529 Schoener, T. W. 1981. An empirically based estimate of home range. - *Theor. Popul. Biol.* 20: 281–325.
- 530 Seaman, D. E. et al. 1999. Effects of Sample Size on Kernel Home Range Estimates. - *J. Wildl. Manag.* 63:  
531 739–747.

- 532 Silva, I. et al. 2022. Autocorrelation-informed home range estimation: A review and practical guide. -  
533 Methods Ecol. Evol. 13: 534–544.
- 534 Soanes, L. M. et al. 2013. How many seabirds do we need to track to define home-range area? - J. Appl.  
535 Ecol. 50: 671–679.
- 536 Spencer, S. R. et al. 1990. Operationally Defining Home Range: Temporal Dependence Exhibited by  
537 Hispid Cotton Rats. - Ecology 71: 1817–1822.
- 538 Sun, C. C. et al. 2014. Trap Configuration and Spacing Influences Parameter Estimates in Spatial Capture-  
539 Recapture Models. - PLOS ONE 9: e88025.
- 540 Thomas, B. et al. 2011. Wildlife tracking technology options and cost considerations. - Wildl. Res. 38:  
541 653–663.
- 542 Van Winkle, W. 1975. Comparison of Several Probabilistic Home-Range Models. - J. Wildl. Manag. 39:  
543 118–123.
- 544 Vieira, W. F. et al. 2019. A comparison of methods to determine chimpanzee home-range size in a  
545 forest-farm mosaic at Madina in Cantanhez National Park, Guinea-Bissau. - Primates J. Primatol.  
546 60: 355–365.
- 547 Ward, G. D. 1984. Comparison of trap- and radio-revealed home ranges of the brush-tailed possum  
548 (*Trichosurus vulpecula* Kerr) in New Zealand lowland forest. - N. Z. J. Zool. 11: 85–92.
- 549 Wickham, H. 2016. ggplot2: Elegant Graphics for Data Analysis. - Springer-Verlag New York.
- 550 Wood, S. N. 2017. Generalized Additive Models: An Introduction with R, Second Edition. - Taylor &  
551 Francis Inc.
- 552 Worton, B. J. 1987. A review of models of home range for animal movement. - Ecol. Model. 38: 277–298.
- 553 Worton, B. J. 1989. Kernel methods for estimating the utilization distribution in home-range studies. -  
554 Ecology 70: 164–168.
- 555 Wszola, L. S. et al. 2019. Simulating detection-censored movement records for home range analysis  
556 planning. - Ecol. Model. 392: 268–278.

## 557 **Figures and tables**

558 Figures were generated using R packages base v 4.0.5 (R Core Team 2019), ggplot2 v 3.3.5 (Wickham  
559 2016), ggpubr 0.4.0 (Kassambara 2020), lemon v 0.4.5 (Edwards 2020) and directlabels v 2021.1.13  
560 (Hocking 2021).

561



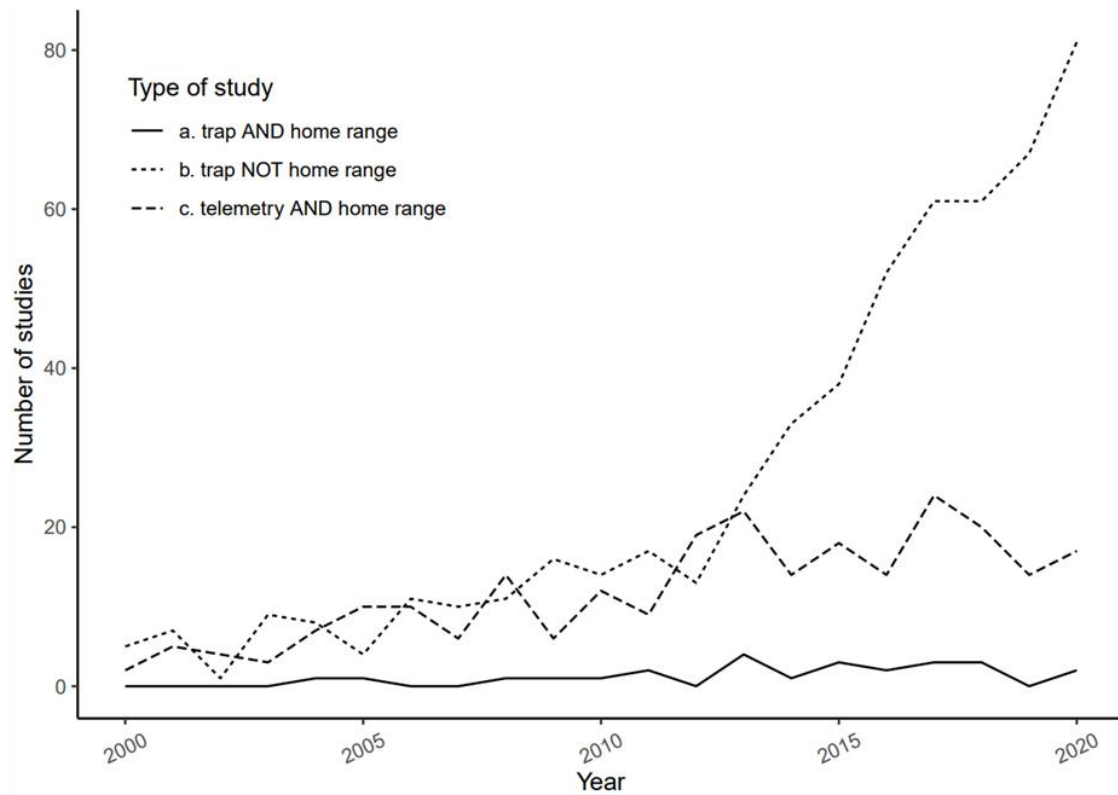

**Figure 1: Published studies using telemetry and trapping data:** Results from a search in ScienceDirect for article sections title-abstract-keywords using the search words: a. ' ("camera trap" OR "live trap") AND "home range" ' for studies using trapping datasets evaluating home ranges, b. ' ("camera trap" OR "live trap") NOT "home range" ' for studies collecting trapping datasets but not using them for home ranges and c. '(GPS OR radio) AND "home range" ' for studies on home range using telemetry methods. Only articles in the fields "Agricultural and Biological Sciences", "Environmental Science" and "Biochemistry, Genetics and Molecular Biology" were included.

562

563

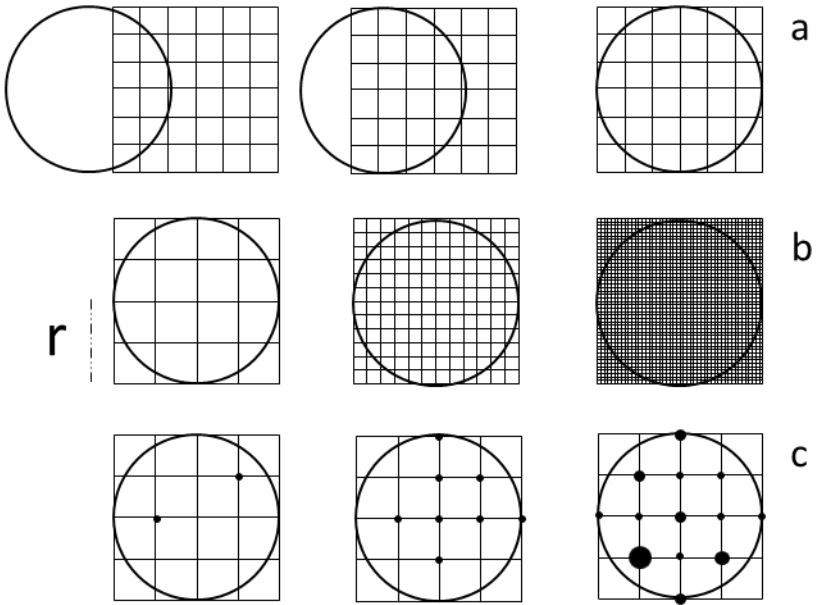

**Figure 2: The three variables of interest for study design:** **a.** The area covered by the trapping grid, with low, medium and total coverage from left to right, **b.** the trap density, with again low, medium and high values of traps per home range radius (illustrated with the dashed bar and the “r” symbol), and **c.** the number of observations, with dots indicating their location and the size of dots their number in a given location.

564

565

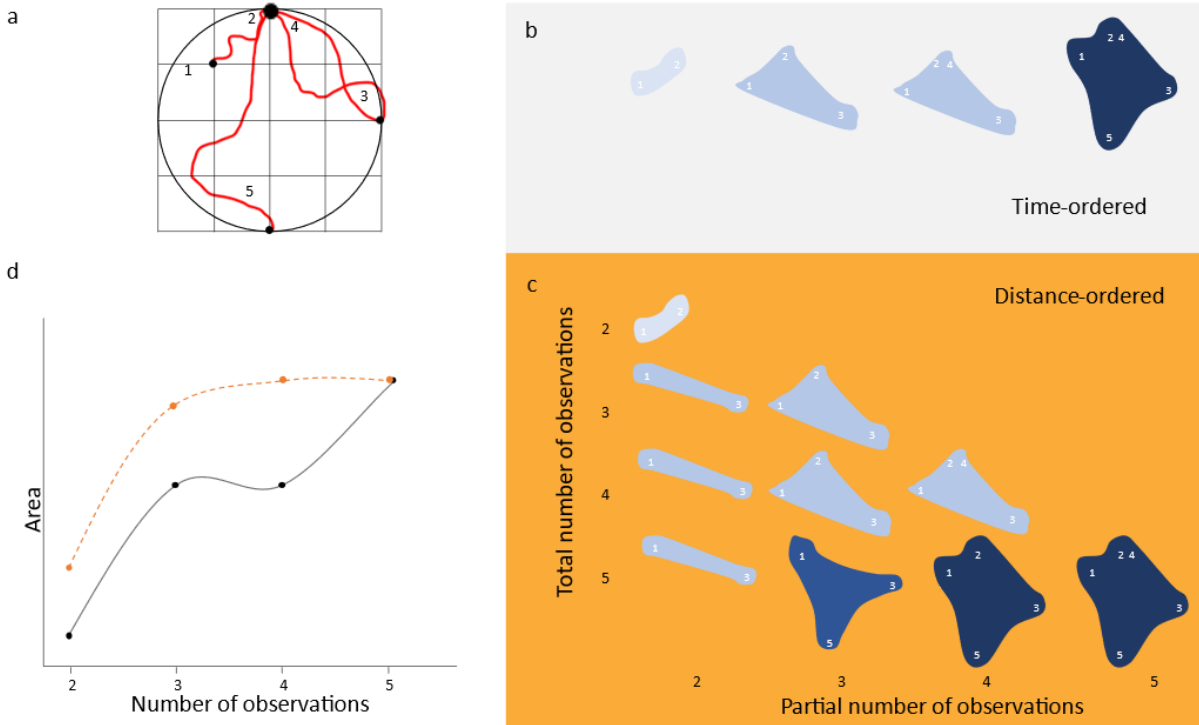

**Figure 3: Time-ordered and distance-ordered sampling curves:** **a.** A hypothetical trapping of an individual with 5 observations, **b.** the succession of home range areas calculated from a. with standard time-ordered incremental analyses, **c.** the different areas estimated from a. by ordering the data based on farthest-point sampling with partial datasets from two to five observations and **d.** representation of the different curves obtained with five observations using either time-ordered (grey continuous) or distance-ordered (orange dashed) incremental analyses.

566

567

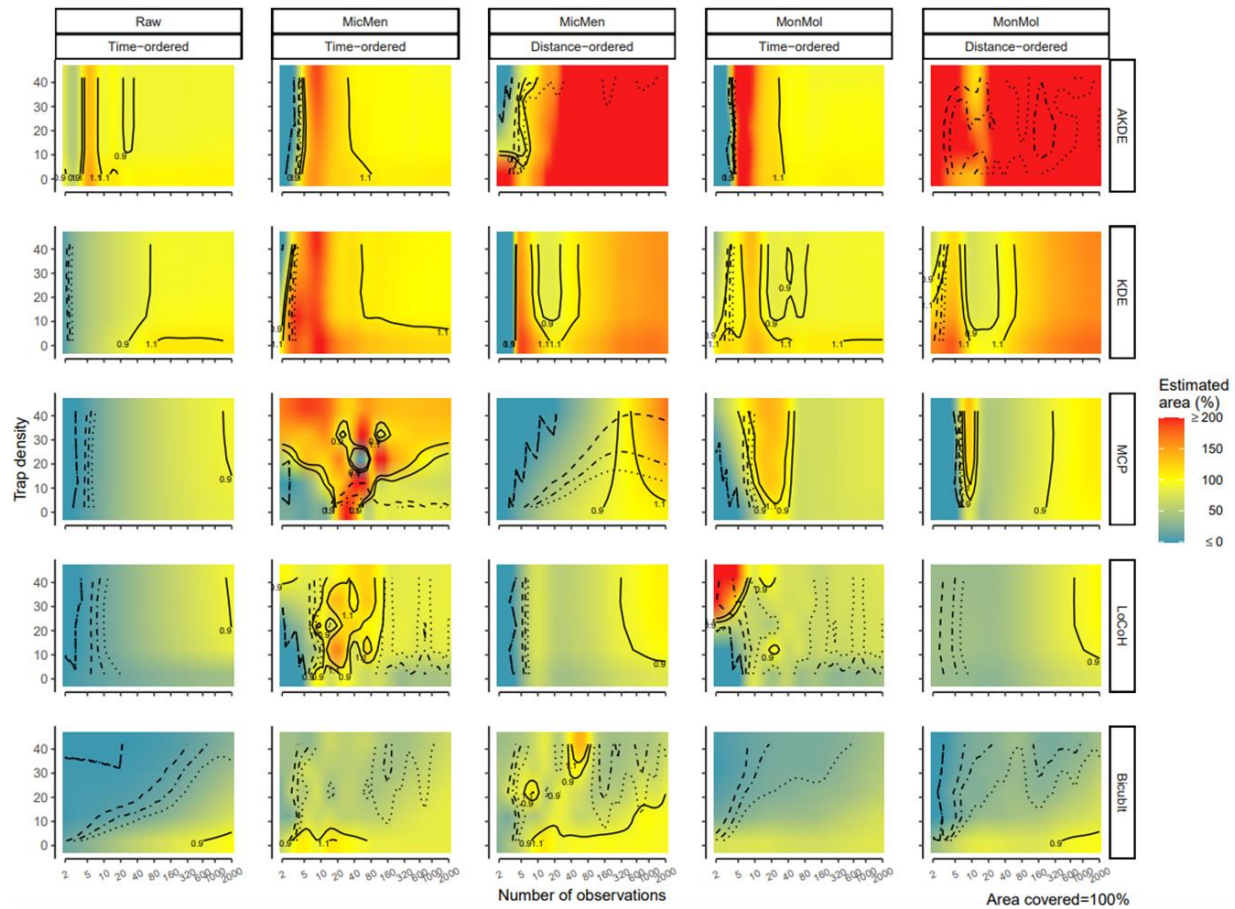

**Figure 4: Interacting effects of number of observations and trap density on home range area estimations:** Rows gather different estimators, from top: autocorrelated Kernel density estimator (AKDE), the traditional version (KDE), minimum convex polygon (MCP), local convex hull (LoCoH) and bicubic interpolation (Bicubit). Columns gather the combination of two factors, the ordering procedure (time or distance) and the asymptotic model used ("Raw" indicating no model, "MicMen" Michaelis-Menten and "MonMol" Monomolecular). The x axis displays the number of observations and the y axis the trap density, the area covered was fixed at 100%. The colors in the plots indicate the estimated area as a percentage of the true area predicted by the GAM model, yellow values approximate the true area, and red indicate over-estimation while blue underestimation. Values above 200% were trimmed and given a 200 while values below 0% were also trimmed as 0 to concentrate color variation on a meaningful range. The solid lines indicate the contour of accurate estimations, defined as  $\pm 10\%$  of the true area. Pointed lines indicate the reliable estimations measured as those where the confidence interval was  $\pm 20\%$  of the estimated area, point-dashed  $\pm 40\%$  and dashed  $\pm 60\%$ . Finally, on the lower-right corner the fixed variable value is indicated.

568

569

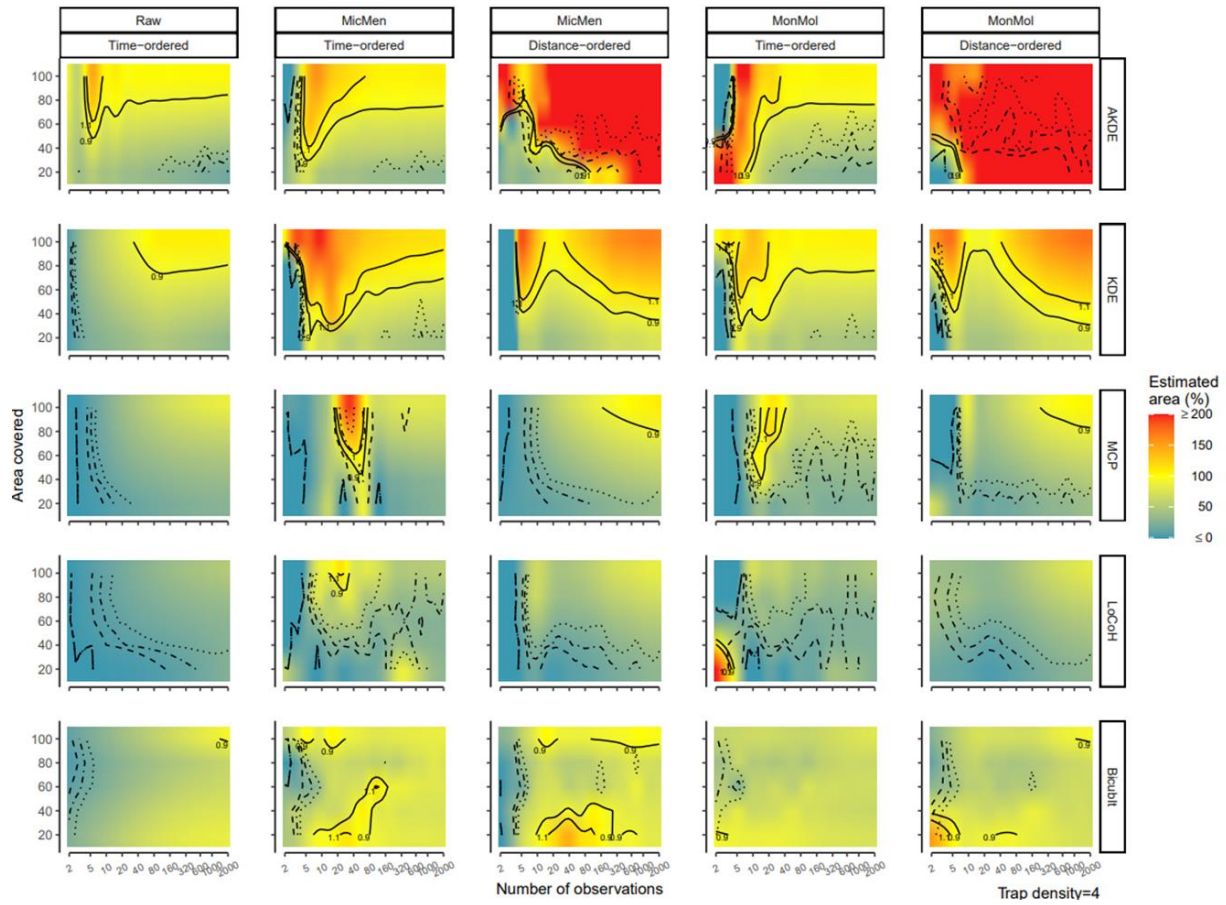

**Figure 5: Interacting effects of number of observations and area covered by the grid on home range area estimations:** Rows gather different estimators, from top: autocorrelated Kernel density estimator (AKDE), the traditional version (KDE), minimum convex polygon (MCP), local convex hull (LoCoH) and bicubic interpolation (Bicublt). Columns gather the combination of two factors, the ordering procedure (time or distance) and the asymptotic model used ("Raw" indicating no model, "MicMen" Michaelis-Menten and "MonMol" Monomolecular). The x axis displays the number of observations and the y axis the proportion of the area covered by the trapping grid, the trap density was fixed at 4 traps per HR radius. The colors in the plots indicate the estimated area as a percentage of the true area predicted by the GAM model, yellow values approximate the true area, and red indicate over-estimation while blue underestimation. Values above 200% were trimmed and given a 200 while values below 0% were also trimmed as 0 to concentrate color variation on a meaningful range. The solid lines indicate the contour of accurate estimations, defined as  $\pm 10\%$  of the true area. Pointed lines indicate the reliable estimations measured as those where the confidence interval was  $\pm 20\%$  of the estimated area, point-dashed  $\pm 40\%$  and dashed  $\pm 60\%$ . Finally, on the lower-right corner the fixed variable value is indicated.



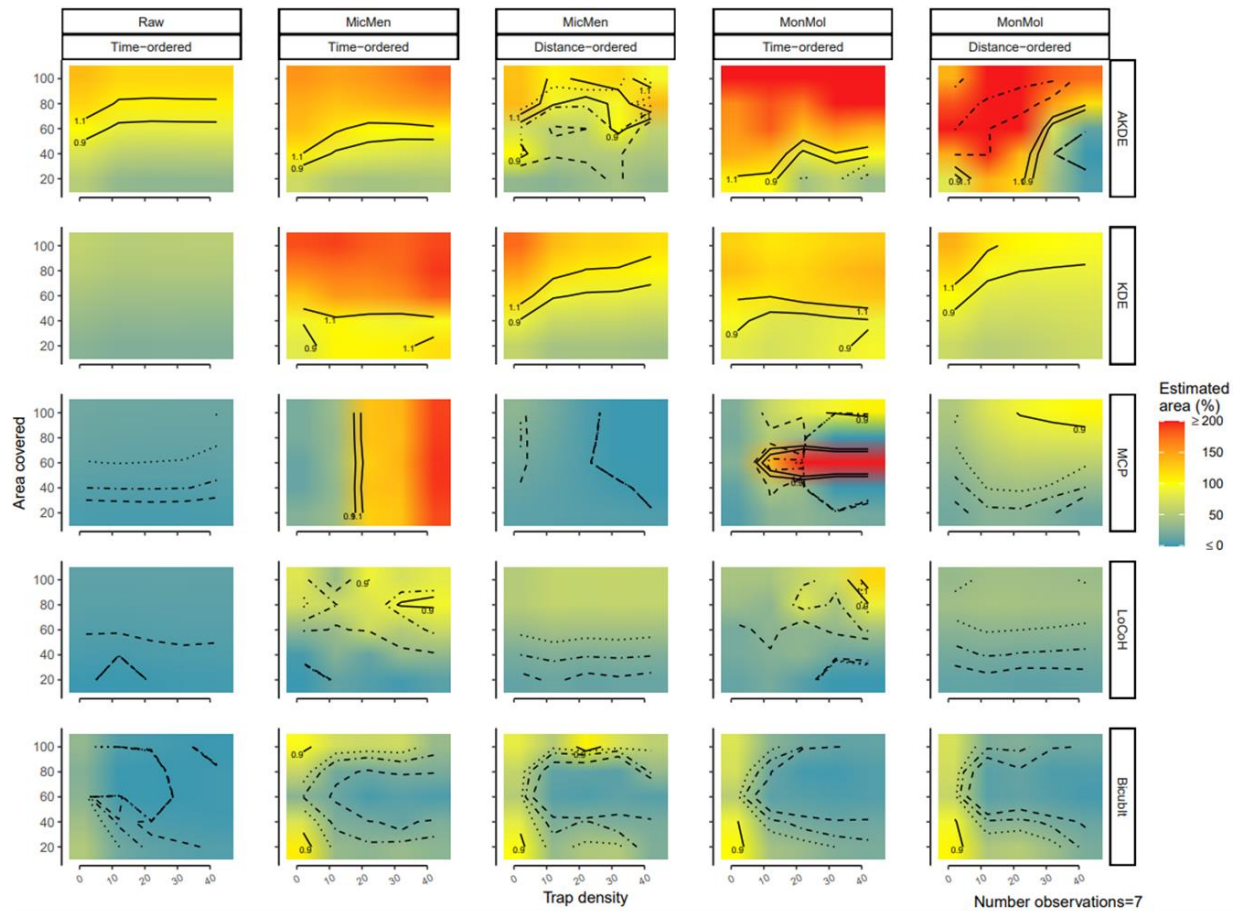

**Figure 6: Interacting effects of trap density and area covered by the grid on home range area estimations:** Rows gather different estimators, from top: autocorrelated Kernel density estimator (AKDE), the traditional version (KDE), minimum convex polygon (MCP), local convex hull (LoCoH) and bicubic interpolation (Bcubit). Columns gather the combination of two factors, the ordering procedure (time or distance) and the asymptotic model used ("Raw" indicating no model, "MicMen" Michaelis-Menten and "MonMol" Monomolecular). The x axis displays the trap density and the y axis the proportion of the area covered by the trapping grid, the number of observations was fixed at 7. The colors in the plots indicate the estimated area as a percentage of the true area predicted by the GAM model, yellow values approximate the true area, and red indicate over-estimation while blue underestimation. Values above 200% were trimmed and given a 200 while values below 0% were also trimmed as 0 to concentrate color variation on a meaningful range. The solid lines indicate the contour of accurate estimations, defined as  $\pm 10\%$  of the true area. Pointed lines indicate the reliable estimations measured as those where the confidence interval was  $\pm 20\%$  of the estimated area, point-dashed  $\pm 40\%$  and dashed  $\pm 60\%$ . Finally, on the lower-right corner the fixed variable value is indicated.
